# Supplementary figures and images for: Dual-activated fluorescent probe for the study of the mechanism of SO 2 and NO in cisplatin resistance of nasopharyngeal carcinoma
Source: Royal Society of Chemistry journal article supplement (doi:10.1039/d5ra08282j), 2026-01-01

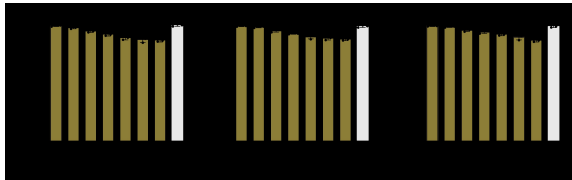

Supplement: d5ra08282j2.pdf [file d5ra08282j2.pdf]
